# Supplementary material
Source: publisher site journal article supplement (https://www.dovepress.com/article/531873)
Supplement: Supplementary file 1 [file Supplementary%20mat.docx]

**Supplementary Tables and Figures**

**Table S1** The parameters of the fitted Ritger-Peppas model (Release % = k·tn)

| Sample | k | n |
| --- | --- | --- |
| pH7.4 | 0.8479 | 0.5408 |
| 0.6181 | 0.7404 |
| 0.5368 | 0.6931 |
| pH6.8 | 11.99 | 0.3635 |
| 9.787 | 0.396 |
| 7.672 | 0.4843 |

**Table S2** Relative parameters of mouse knee joint in micro-CT scanning.

| Indexes | Control | OA | OPC | Tet | OPC-Tet |
| --- | --- | --- | --- | --- | --- |
| BMD  (g/cm^3) | 0.41 ± 0.02 | 0.34 ± 0.02# | 0.36 ± 0.01 | 0.38 ± 0.02 | 0.40 ± 0 |
| BV  (mm^3) | 0.34 ± 0.01 | 0.24 ± 0.01# | 0.27 ± 0.03 | 0.28 ± 0.02 | 0.30 ± 0.02 |
| BV/TV  (%) | 58.85 ± 3.82 | 36.31 ± 3.10# | 38.07 ± 5.90 | 41.18 ± 3.72 | 47.23 ± 2.44 |
| BS  (mm^2) | 10.20 ± 0.44 | 11.67 ± 0.59# | 10.82 ± 0.17 | 10.53 ± 0.12 | 10.37 ± 0.20 |
| BS/BV  (1/mm) | 0.28 ± 0.01 | 0.24 ± 0.01# | 0.30 ± 0.03 | 0.26 ± 0.02 | 0.24 ± 0.02 |
| BS/TV  (1/mm) | 0.68 ± 0.03 | 0.55 ± 0.04# | 0.55 ± 0.03 | 0.62 ± 0.02 | 0.65 ± 0.03 |
| Tb.pf  (1/mm) | 4.25 ± 0.66 | 9.99 ± 0.43# | 7.92 ± 0.60 | 7.41 ± 0.73 | 6.59 ± 0.52 |
| Tb.N  (1/mm) | 4.63 ± 0.15 | 2.42 ± 0.17# | 3.35 ± 0.43 | 3.94 ± 0.31 | 4.20 ± 0.17 |
| Tb.Sp  (mm) | 0.24 ± 0.01 | 0.36 ± 0.03# | 0.28 ± 0.02 | 0.25 ± 0.03 | 0.23 ± 0.01 |

Note: # P < 0.05, OA vs Control, treated vs OA, Mean ± SD, n = 3.


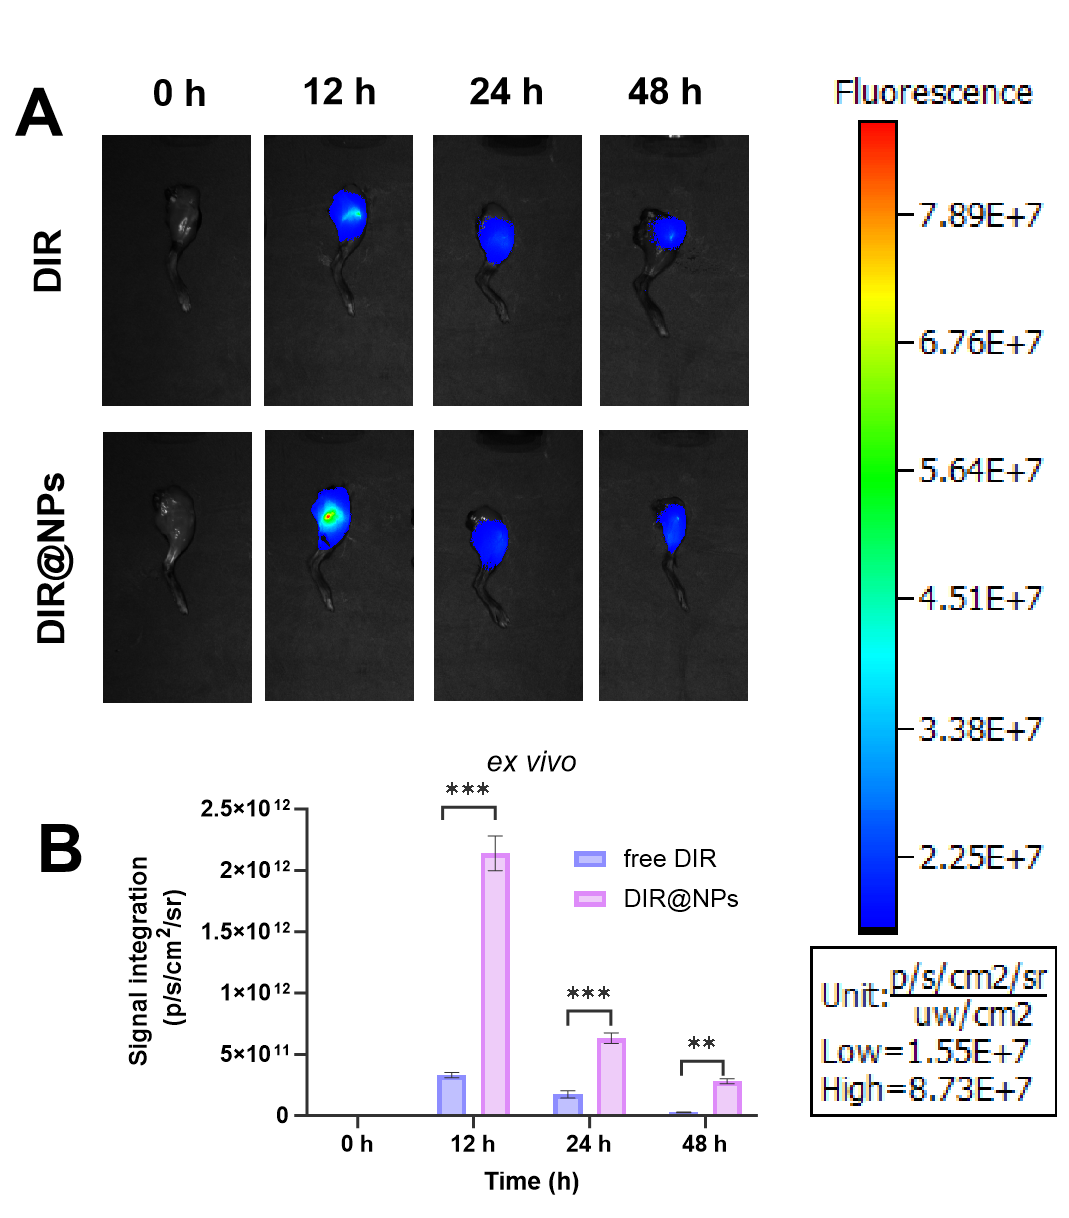


**Figure S1** Fluorescence imaging of OPC-Tet NPs in OA mice. (A) Fluorescence imaging *ex vivo* in mice at different time points after injection of free DIR and DIR@NPs. (B) Comparison of fluorescence intensities of free DIR and DIR@NPs *ex vivo*. Mean ± SD, n = 3. **P* < 0.05, ***P* < 0.01, and ****P* < 0.001.
